# Supplementary material for: FINDER: an automated software package to annotate eukaryotic genes from RNA-Seq data and associated protein sequences
Source: PubMed Central journal article supplement (PMC8056616; doi:10.1186/s12859-021-04120-9), 2021-04-20
Supplement: 12859_2021_4120_MOESM1_ESM.pdf [file 12859_2021_4120_MOESM1_ESM.pdf]

Figure S1

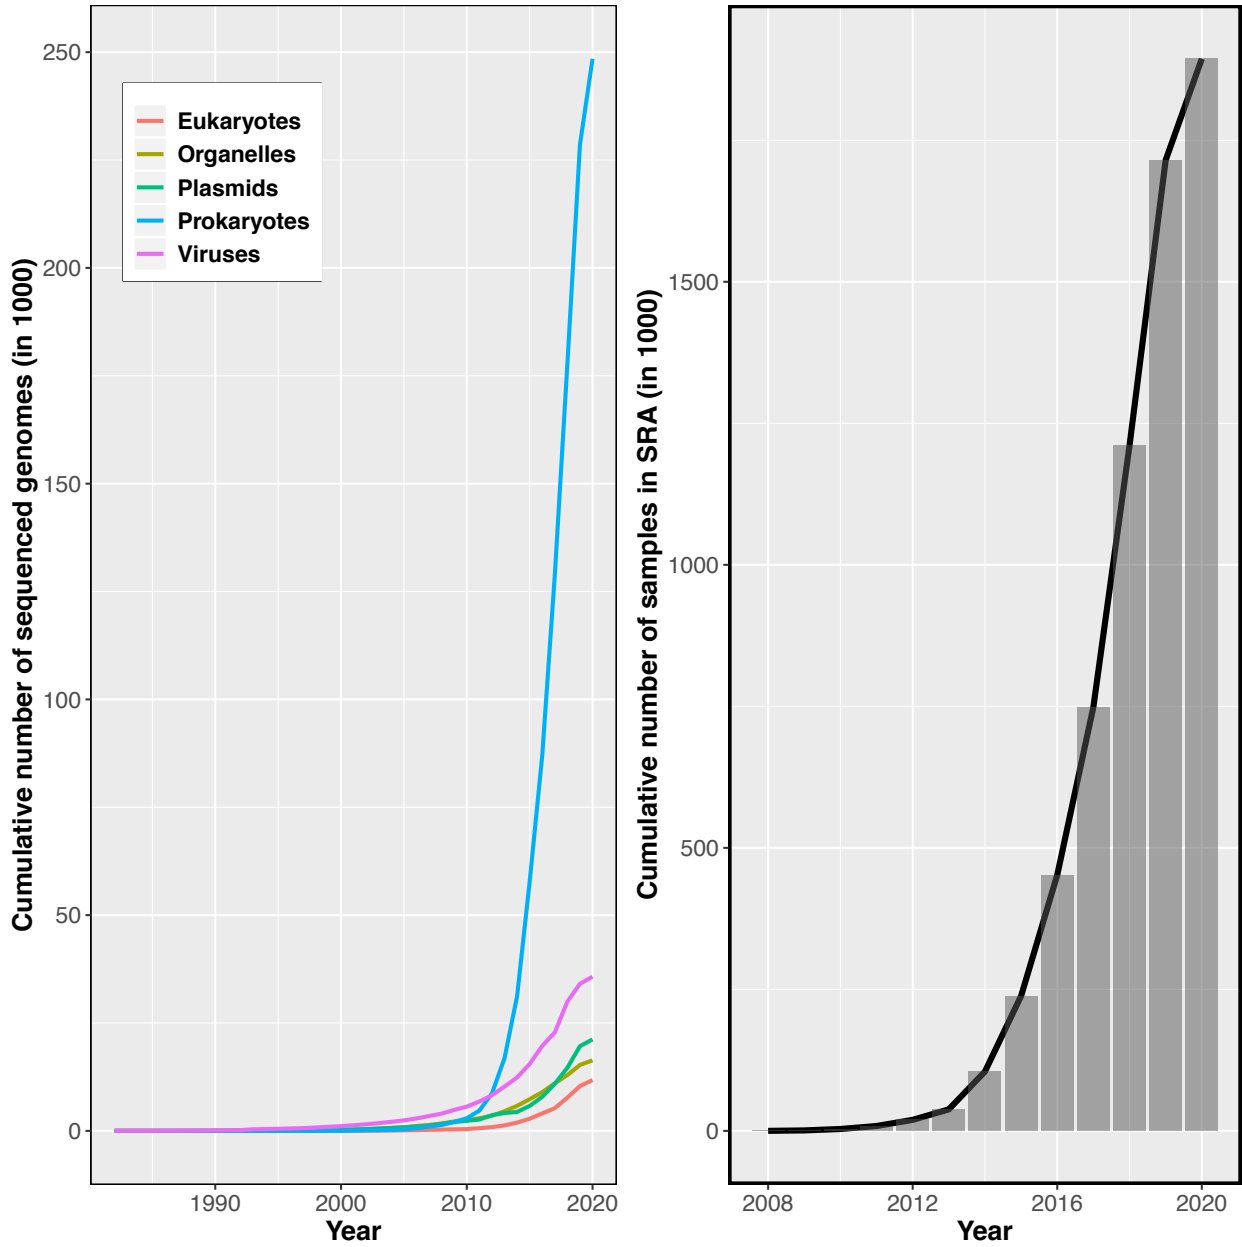

Fig. S1 Increase in the number of genomes and the number of sequenced samples over the course of the last decade

**Figure S2**

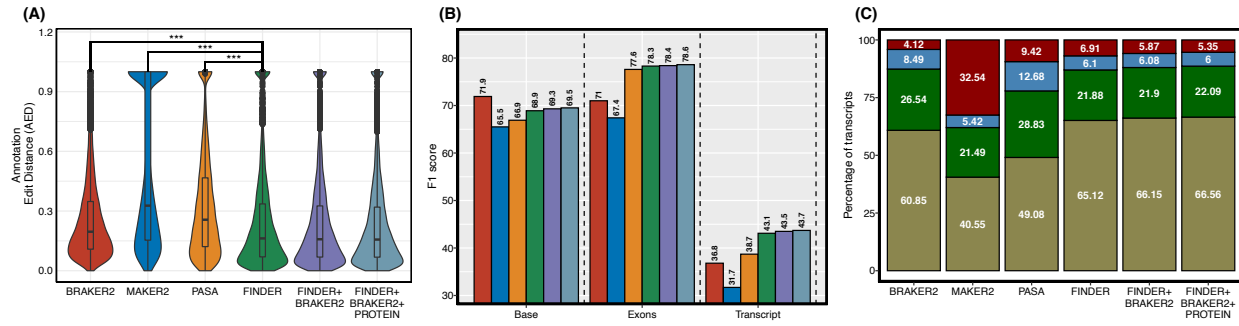

**Fig. S2** Performance comparison of predicted annotations with reference annotations of *Drosophila melanogaster* (A) Distribution of AED scores (B) Bar plot of F1 scores (C) Stacked bar plot showing percentage of transcripts in each of the four groups of AEDs

**Figure S3**

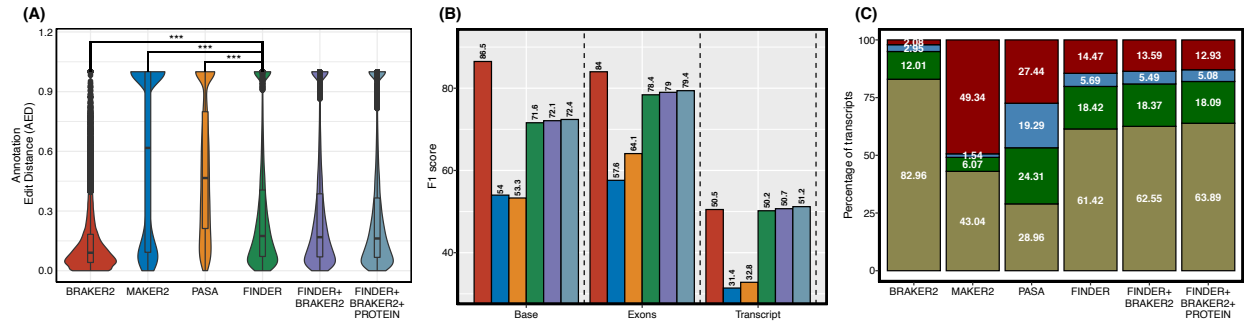

**Fig. S3** Performance comparison of predicted annotations with reference annotations of *Caenorhabditis elegans* (A) Distribution of AED scores (B) Bar plot of F1 scores (C) Stacked bar plot showing percentage of transcripts in each of the four groups of AEDs

**Figure S4**

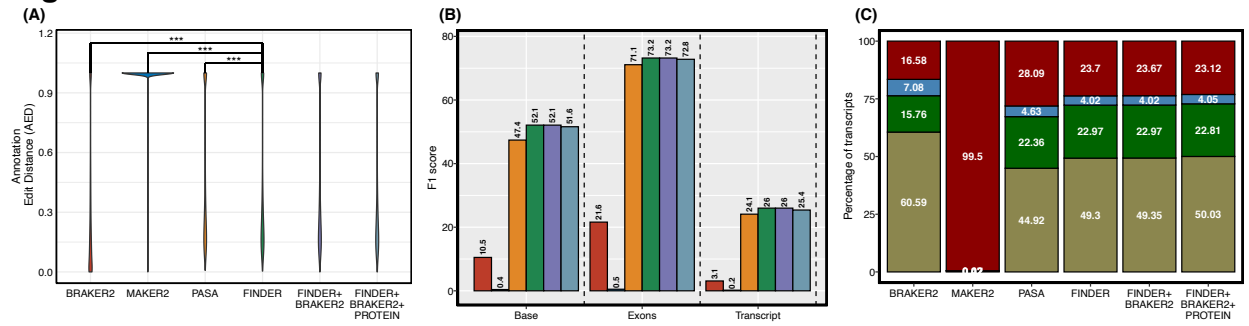

**Fig. S4** Performance comparison of predicted annotations with reference annotations of *Hordeum vulgare* (A) Distribution of AED scores (B) Bar plot of F1 scores (C) Stacked bar plot showing percentage of transcripts in each of the four groups of AEDs

**Figure S5**

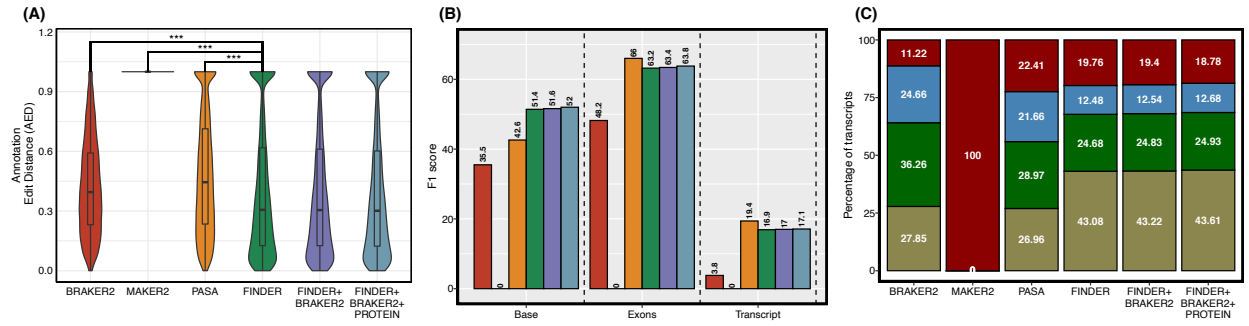

**Fig. S5** Performance comparison of predicted annotations with reference annotations of *Homo sapiens* (A) Distribution of AED scores (B) Bar plot of F1 scores (C) Stacked bar plot showing percentage of transcripts in each of the four groups of AEDs

**Figure S6**

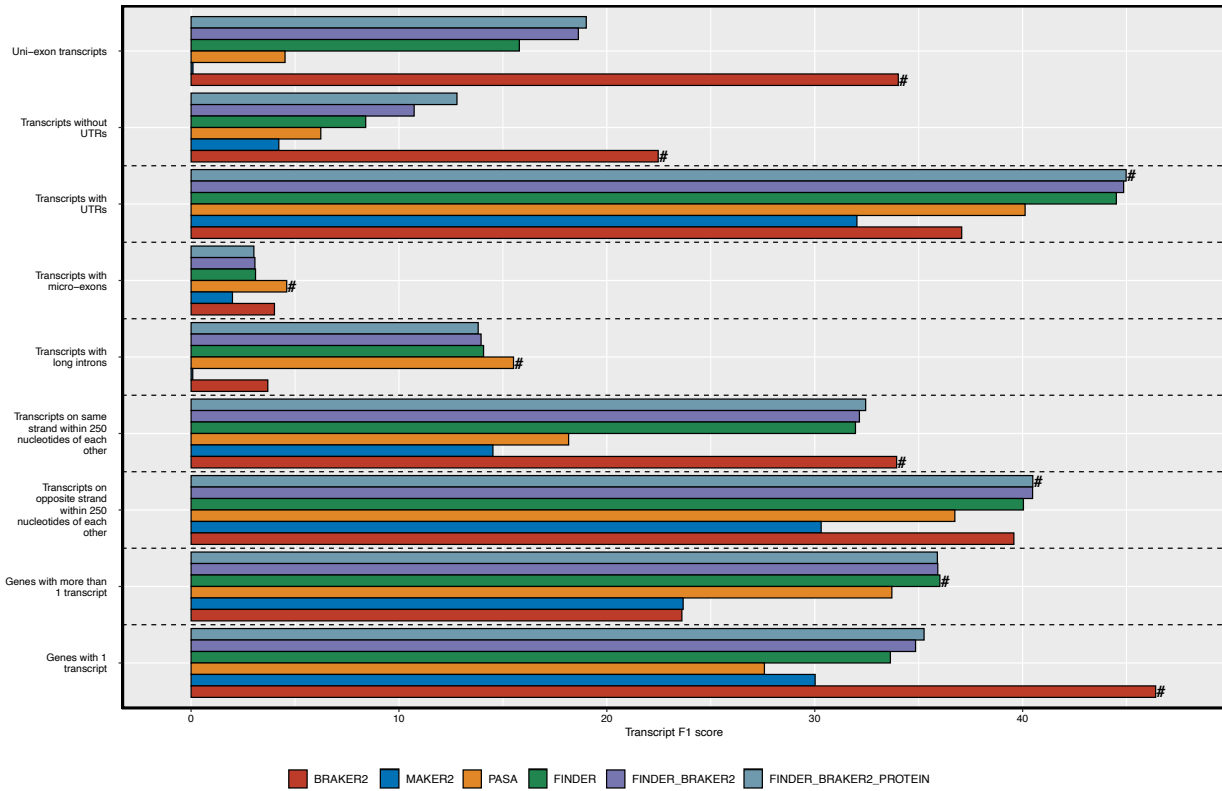

**Fig. S6** Comparison of performance of FINDER with other gene annotation pipelines on different groups of genes in *Drosophila melanogaster*

**Figure S7**

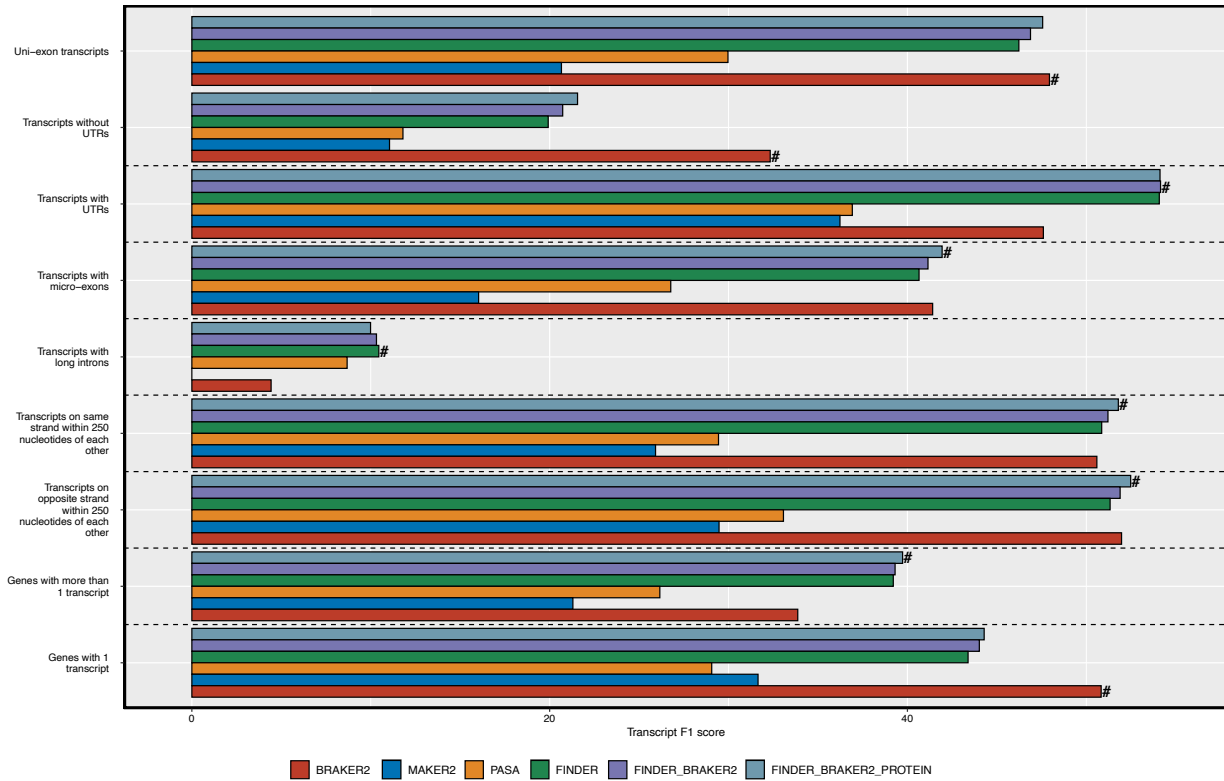

**Fig. S7** Comparison of performance of FINDER with other gene annotation pipelines on different groups of genes in *Caenorhabditis elegans*

**Figure S8**

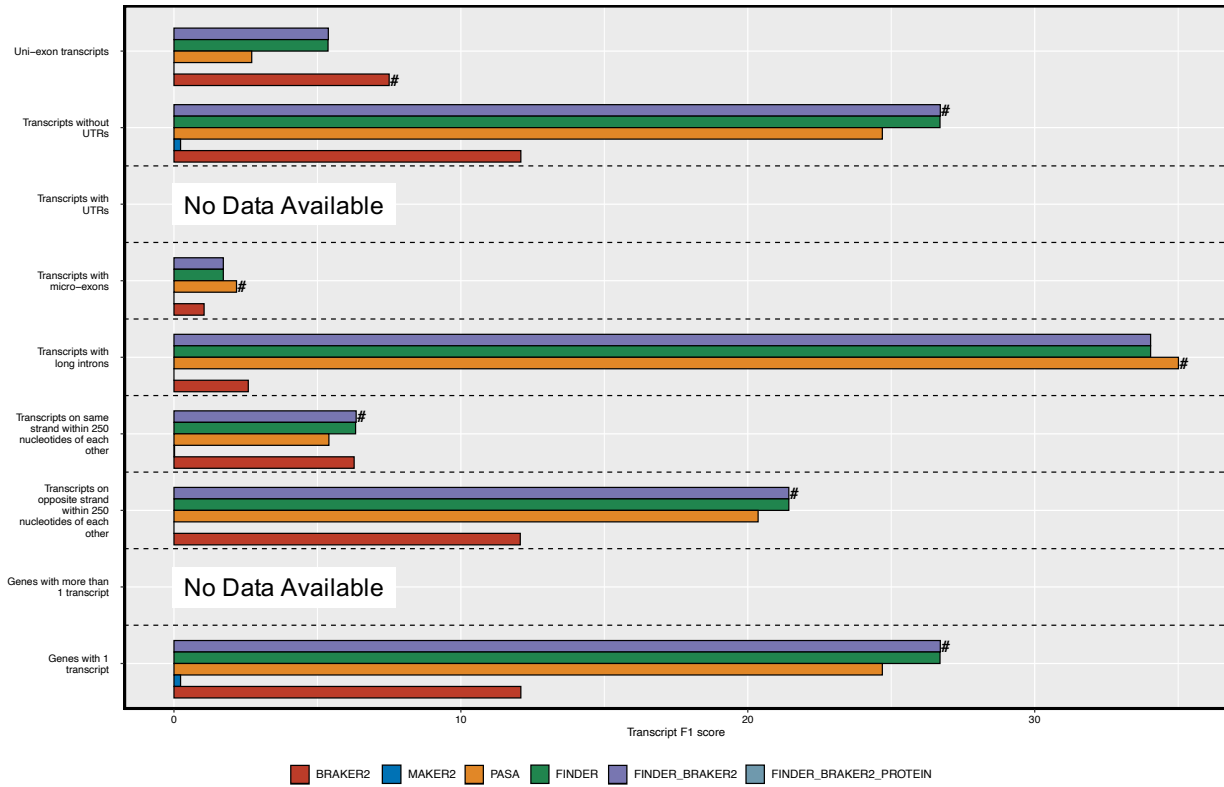

**Fig. S8** Comparison of performance of FINDER with other gene annotation pipelines on different groups of genes in *Hordeum vulgare*



**Figure S9**

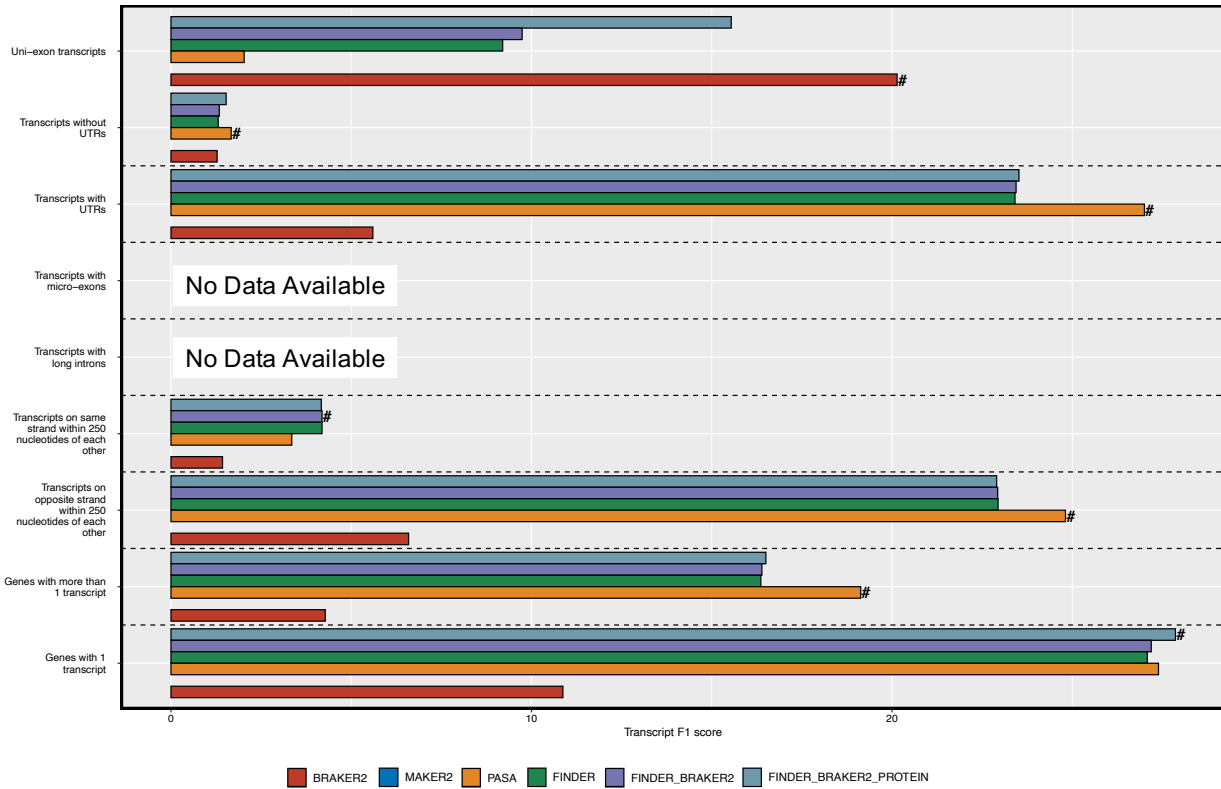

**Fig. S9** Comparison of performance of FINDER with other gene annotation pipelines on different groups of genes in *Homo sapiens*
